# Supplementary material for: Approaches to multiplicity in publicly funded pragmatic randomised controlled trials: a survey of clinical trials units and a rapid review of published trials
Source: PubMed Central journal article supplement (PMC8818238; doi:10.1186/s12874-022-01525-9), 2022-02-06
Supplement: 12874_2022_1525_MOESM1_ESM.pdf [file 12874_2022_1525_MOESM1_ESM.pdf]

## Additional file 1

### Access database used for data collection in the review

#### Page 1: General information

| GENERAL INFORMATION                     |                                    |
|-----------------------------------------|------------------------------------|
| Manuscript reference number             | <input type="text" value="(New)"/> |
| Clinical trials registration number     | <input type="text"/>               |
| Journal                                 | <input type="text" value=""/>      |
| Lead author                             | <input type="text"/>               |
| Title                                   | <input type="text"/>               |
| Citation                                | <input type="text"/>               |
| Population                              | <input type="text"/>               |
| Trial design                            | <input type="text" value=""/>      |
| Other trial design info                 | <input type="text"/>               |
| Allocation ratio                        | <input type="text"/>               |
| Trial phase                             | <input type="text" value=""/>      |
| Total number of randomised participants | <input type="text" value="0"/>     |
| Interventions                           | <input type="text"/>               |
| Trial conclusions                       | <input type="text" value=""/>      |

## Page 2: Multiplicity due to outcomes

|                                                             |                                |
|-------------------------------------------------------------|--------------------------------|
| <b>PRIMARY OUTCOME(S)</b>                                   |                                |
| Primary outcome(s)                                          | <input type="text"/>           |
| Number of primary outcomes stated                           | <input type="text" value="0"/> |
| Number of primary outcome comparisons made                  | <input type="text" value="0"/> |
| Discrepancies in numbers of outcomes/comparisons            | <input type="text"/>           |
| Table numbers (primary)                                     | <input type="text"/>           |
| Statistical approach to multiplicity (primary outcomes)     | <input type="text"/>           |
| Further multiplicity details, primary                       | <input type="text"/>           |
| Number of other comparisons made related to primary outcome | <input type="text" value="0"/> |
| Details of such comparisons                                 | <input type="text"/>           |
| Any other info, primary                                     | <input type="text"/>           |
| Co-primary outcomes                                         | <input type="text"/>           |
| <b>SECONDARY OUTCOMES</b>                                   |                                |
| Number of secondary outcomes stated                         | <input type="text" value="0"/> |
| Number of secondary outcome comparisons made                | <input type="text" value="0"/> |
| Discrepancies in numbers of secondary outcomes/comparisons  | <input type="text"/>           |
| Tables numbers (secondary)                                  | <input type="text"/>           |
| Statistical approach to multiplicity (secondary outcome)    | <input type="text"/>           |
| Further multiplicity details, secondary                     | <input type="text"/>           |
| Any other info, secondary                                   | <input type="text"/>           |

|                                                              |                          |
|--------------------------------------------------------------|--------------------------|
| <b>REPEATED MEASURES</b>                                     |                          |
| Repeated measurements for any outcomes                       | <input type="text"/>     |
| Already counted in primary/secondary comparisons?            | <input type="checkbox"/> |
| Statistical approach to multiplicity (repeated measurements) | <input type="text"/>     |
| Further multiplicity details, repeated                       | <input type="text"/>     |
| Any other info, repeated                                     | <input type="text"/>     |

### Page 3: Multiplicity due to other factors

| TREATMENT GROUPS                                           |                                |
|------------------------------------------------------------|--------------------------------|
| Number of treatment groups                                 | <input type="text" value="0"/> |
| Statistical approach to multiplicity (multiple treatments) | <input type="text" value="v"/> |
| Further multiplicity details, treatments                   | <input type="text"/>           |
| Any other info, treatments                                 | <input type="text"/>           |
| Number of comparisons                                      | <input type="text" value="0"/> |
| Description of comparisons                                 | <input type="text"/>           |
| Comparisons related?                                       | <input type="checkbox"/>       |
| SUBGROUP ANALYSES                                          |                                |
| Number of pre-specified subgroup analyses reported         | <input type="text" value="0"/> |
| Number of post-hoc subgroup analyses reported              | <input type="text" value="0"/> |
| Outcomes subgroup analyses performed for                   | <input type="text" value="v"/> |
| Statistical approach to multiplicity (subgroups)           | <input type="text" value="v"/> |
| Further multiplicity details, subgroups                    | <input type="text"/>           |
| Any other info, subgroups                                  | <input type="text"/>           |
| INTERIM ANALYSES                                           |                                |
| Interim analyses mentioned?                                | <input type="checkbox"/>       |
| Number of interim analyses performed                       | <input type="text" value="0"/> |
| Statistical approach to multiplicity (interim)             | <input type="text" value="v"/> |
| Further multiplicity details, interim                      | <input type="text"/>           |
| Any other info, interim                                    | <input type="text"/>           |

| OTHER                                        |                                |
|----------------------------------------------|--------------------------------|
| Other multiplicity concerns                  | <input type="text"/>           |
| Statistical approach to multiplicity (other) | <input type="text" value="v"/> |
| Further multiplicity details, other          | <input type="text"/>           |
| Any justification for multiplicity approach  | <input type="text"/>           |
| Any other relevant information               | <input type="text" value=" "/> |
