# Supplementary material for: Approaches to multiplicity in publicly funded pragmatic randomised controlled trials: a survey of clinical trials units and a rapid review of published trials
Source: PubMed Central journal article supplement (PMC8818238; doi:10.1186/s12874-022-01525-9), 2022-02-06
Supplement: 12874_2022_1525_MOESM3_ESM.pdf [file 12874_2022_1525_MOESM3_ESM.pdf]

Additional file 3

Supplementary tables and figures

**Table S1** Review: characteristics of trials that did/did not have multiple primary outcomes

| Characteristic                                        |                                     | Multiple primary                   |             | Single primary outcome |             |
|-------------------------------------------------------|-------------------------------------|------------------------------------|-------------|------------------------|-------------|
|                                                       |                                     | outcomes (n=28)                    |             | (n=110)                |             |
| Journal                                               | Annals Int Med                      | 1/28                               | 4%          | 3/110                  | 3%          |
|                                                       | BMJ                                 | 4/28                               | 14%         | 7/110                  | 6%          |
|                                                       | JAMA                                | 7/28                               | 25%         | 21/110                 | 19%         |
|                                                       | Lancet                              | 6/28                               | 21%         | 24/110                 | 22%         |
|                                                       | NEJM                                | 5/28                               | 18%         | 31/110                 | 28%         |
|                                                       | NIHR HTA                            | 4/28                               | 14%         | 13/110                 | 12%         |
|                                                       | PlosMED                             | 1/28                               | 4%          | 11/110                 | 10%         |
|                                                       | Trial design                        | Parallel group: 2 treatment groups | 17/28       | 61%                    | 77/110      |
|                                                       | Parallel group: >2 treatment groups | 6/28                               | 21%         | 12/110                 | 11%         |
|                                                       | Cluster randomised                  | 3/28                               | 11%         | 20/110                 | 18%         |
|                                                       | Crossover                           | 1/28                               | 4%          | 1/110                  | 1%          |
|                                                       | Factorial                           | 1/28                               | 4%          | 4/110                  | 4%          |
|                                                       | Stepped wedge                       | 0/28                               | 0%          | 2/110                  | 2%          |
|                                                       | Non-inferiority                     | 6/28                               | 21%         | 12/110                 | 11%         |
|                                                       | Equivalence                         | 0/28                               | 0%          | 1/110                  | 1%          |
| Total number of randomised participants, median (IQR) |                                     | 485                                | (291, 1899) | 606                    | (319, 2157) |

**Table S2** Review: characteristics of trials that did/did not perform multiple treatment comparisons

| Characteristic |                | More than two           |     | Two treatment groups |     |
|----------------|----------------|-------------------------|-----|----------------------|-----|
|                |                | treatment groups (n=23) |     | (n=115)              |     |
| Journal        | Annals Int Med | 1/23                    | 4%  | 3/115                | 3%  |
|                | BMJ            | 1/23                    | 4%  | 10/115               | 9%  |
|                | JAMA           | 4/23                    | 17% | 24/115               | 21% |

|              |                                         |       |             |        |             |
|--------------|-----------------------------------------|-------|-------------|--------|-------------|
|              | Lancet                                  | 7/23  | 30%         | 23/115 | 20%         |
|              | NEJM                                    | 5/23  | 22%         | 31/115 | 27%         |
|              | NIHR HTA                                | 3/23  | 13%         | 14/115 | 12%         |
|              | PlosMED                                 | 2/23  | 9%          | 10/115 | 9%          |
| Trial design | Parallel group: 2 treatment groups      | 0/23  | 0%          | 94/115 | 82%         |
|              | Parallel group: >2 treatment groups     | 18/23 | 78%         | 0/115  | 0%          |
|              | Cluster randomised                      | 3/23  | 13%         | 20/115 | 17%         |
|              | Crossover                               | 0/23  | 0%          | 2/115  | 2%          |
|              | Factorial                               | 5/23  | 22%         | 0/115  | 0%          |
|              | Stepped wedge                           | 0/23  | 0%          | 2/115  | 2%          |
|              | Non-inferiority                         | 2/23  | 9%          | 16/115 | 14%         |
|              | Equivalence                             | 0/23  | 0%          | 1/115  | 1%          |
|              | Total number of randomised participants | 722   | (374, 5177) | 513    | (300, 2043) |

**Table S3 Review: characteristics of trials that did/did not perform subgroup analyses**

| Characteristic |                                     | Subgroup analyses                  |       | No subgroup analyses |       |
|----------------|-------------------------------------|------------------------------------|-------|----------------------|-------|
|                |                                     | performed (n=85)                   |       | performed (n=53)     |       |
| Journal        | Annals Int Med                      | 2/85                               | 2%    | 2/53                 | 4%    |
|                | BMJ                                 | 8/85                               | 9%    | 3/53                 | 6%    |
|                | JAMA                                | 19/85                              | 22%   | 9/53                 | 17%   |
|                | Lancet                              | 16/85                              | 19%   | 14/53                | 26%   |
|                | NEJM                                | 19/85                              | 22%   | 17/53                | 32%   |
|                | NIHR HTA                            | 14/85                              | 16%   | 3/53                 | 6%    |
|                | PlosMED                             | 7/85                               | 8%    | 5/53                 | 9%    |
|                | Trial design                        | Parallel group: 2 treatment groups | 61/85 | 72%                  | 33/53 |
|                | Parallel group: >2 treatment groups | 9/85                               | 11%   | 9/53                 | 17%   |
|                | Cluster randomised                  | 13/85                              | 15%   | 10/53                | 19%   |
|                | Crossover                           | 1/85                               | 1%    | 1/53                 | 2%    |
|                | Factorial                           | 2/85                               | 2%    | 3/53                 | 6%    |
|                | Stepped wedge                       | 2/85                               | 2%    | 0/53                 | 0%    |

|                                         |      |             |       |             |
|-----------------------------------------|------|-------------|-------|-------------|
| Non-inferiority                         | 7/85 | 8%          | 11/53 | 21%         |
| Equivalence                             | 1/85 | 1%          | 0/53  | 0%          |
| Total number of randomised participants | 631  | (350, 2555) | 470   | (290, 1241) |

**Table S4 Review: characteristics of trials that did/did not perform interim analyses**

| Characteristic                          |                                     | Interim analyses                   |             | No interim analyses |             |
|-----------------------------------------|-------------------------------------|------------------------------------|-------------|---------------------|-------------|
|                                         |                                     | performed (n=41)                   |             | performed (n=97)    |             |
| Journal                                 | Annals Int Med                      | 0/41                               | 0%          | 4/97                | 4%          |
|                                         | BMJ                                 | 0/41                               | 0%          | 11/97               | 11%         |
|                                         | JAMA                                | 7/41                               | 17%         | 21/97               | 22%         |
|                                         | Lancet                              | 11/41                              | 27%         | 19/97               | 20%         |
|                                         | NEJM                                | 18/41                              | 44%         | 18/97               | 19%         |
|                                         | NIHR HTA                            | 5/41                               | 12%         | 12/97               | 12%         |
|                                         | PlosMED                             | 0/41                               | 0%          | 12/97               | 12%         |
|                                         | Trial design                        | Parallel group: 2 treatment groups | 33/41       | 80%                 | 61/97       |
|                                         | Parallel group: >2 treatment groups | 3/41                               | 7%          | 15/97               | 15%         |
|                                         | Cluster randomised                  | 3/41                               | 7%          | 20/97               | 21%         |
|                                         | Crossover                           | 0/41                               | 0%          | 2/97                | 2%          |
|                                         | Factorial                           | 2/41                               | 5%          | 3/97                | 3%          |
|                                         | Stepped wedge                       | 1/41                               | 2%          | 1/97                | 1%          |
|                                         | Non-inferiority                     | 4/41                               | 10%         | 14/97               | 14%         |
|                                         | Equivalence                         | 0/41                               | 0%          | 1/97                | 1%          |
| Total number of randomised participants |                                     | 782                                | (363, 3096) | 500                 | (306, 1638) |

**Table S5 Survey: existing practices in CTUs to address multiplicity**

| Characteristic                                                                                                                           |                                                  | n/N   | %   |
|------------------------------------------------------------------------------------------------------------------------------------------|--------------------------------------------------|-------|-----|
| At what stage is the approach to address multiplicity in RCTs usually determined?                                                        | Design (stated in application)                   | 15/27 | 56% |
|                                                                                                                                          | Design (stated in protocol)                      | 2/27  | 7%  |
|                                                                                                                                          | Design (stated in SAP)                           | 6/27  | 22% |
|                                                                                                                                          | Analysis                                         | 1/27  | 4%  |
|                                                                                                                                          | Varies                                           | 3/27  | 11% |
|                                                                                                                                          | Never determined                                 | 0/27  | 0%  |
| If determined at the design stage, have there been circumstances when post-hoc decisions have been made about multiplicity? <sup>1</sup> | Yes                                              | 10/26 | 38% |
|                                                                                                                                          | No                                               | 12/26 | 46% |
|                                                                                                                                          | Unsure                                           | 4/26  | 15% |
| Is the approach to multiplicity in your CTU? <sup>2</sup>                                                                                | Standard across all trials                       | 5/27  | 19% |
|                                                                                                                                          | Bespoke approach that varies from trial to trial | 21/27 | 78% |
|                                                                                                                                          | Other                                            | 1/27  | 4%  |
| Would your approach to multiplicity vary according to how pragmatic the trial is? <sup>3</sup>                                           | Yes                                              | 10/27 | 37% |
|                                                                                                                                          | Possibly                                         | 9/27  | 33% |
|                                                                                                                                          | No                                               | 4/27  | 15% |
|                                                                                                                                          | Unsure                                           | 4/27  | 15% |

**Notes:**

<sup>1</sup> For those that responded “yes”, further comments have been categorized into: oversight committee’s request (n=2), post-hoc outcomes or analyses added (n=3), peer-review suggestions (n=2), changes made when writing SAP (n=2), miscellaneous (n=1)

<sup>2</sup> Further comments have been categorized into:

- Standard across all trials: standard approach for translational studies only (n=1)
- Bespoke approach: context specific (n=7), differs for multi-arm trials (n=2), varies between statisticians (n=1), different approach for trials seeking licensing approval (n=1)
- Other: by therapeutic area (n=1)

<sup>3</sup> Further comments have been categorized into:

- Responded yes/possibly: adjustments less necessary for early phase trials (n=5), adjustments less necessary for pragmatic trials (n=2), miscellaneous (n=3)
- Responded no: based on design, not phase (n=1), miscellaneous (n=1)
- Responded unsure: adjustments less necessary for pragmatic trials (n=1), mainly do pragmatic trials (n=2)

**Table S6 Survey: effect of other trial design features on the approach to multiplicity**

| Situation                                                                          | Yes  |     | No    |     | Unsure |     |
|------------------------------------------------------------------------------------|------|-----|-------|-----|--------|-----|
|                                                                                    | n/N  | %   | n/N   | %   | n/N    | %   |
| Would the following trial design features affect your decision to implement a MTP? |      |     |       |     |        |     |
| Trial design (e.g. cluster, factorial, crossover)                                  | 9/26 | 35% | 14/26 | 54% | 3/26   | 12% |
| Hypothesis type (e.g. superiority, non-inferiority, equivalence)                   | 5/26 | 19% | 17/26 | 65% | 4/26   | 15% |
| Intervention type (e.g. complex, behavioural, pharmacological)                     | 6/26 | 23% | 18/26 | 69% | 2/26   | 8%  |
| Imbalanced trial allocation (e.g. 2:1)                                             | 1/26 | 4%  | 21/26 | 81% | 4/26   | 15% |

**Notes:**

Other information given was classified as follow: factorial design may affect decision to adjust (n=3), non-inferiority/equivalence design requires thought (n=1), none of these factors would affect decision to adjust (n=7)

**Table S7 Survey: statistical methods used to address multiplicity**

| Method                                  | Often used |     | Occasionally used |     | Never used |     |
|-----------------------------------------|------------|-----|-------------------|-----|------------|-----|
|                                         | n/N        | %   | n/N               | %   | n/N        | %   |
| Bonferroni procedure <sup>1</sup>       | 8/27       | 30% | 16/27             | 59% | 3/27       | 11% |
| Simes procedure                         | 0/27       | 0%  | 4/25              | 16% | 21/25      | 84% |
| Holm step-down procedure <sup>2</sup>   | 0/27       | 0%  | 8/25              | 32% | 17/25      | 68% |
| Hochberg step-up procedure <sup>2</sup> | 0/27       | 0%  | 6/25              | 24% | 19/25      | 76% |
| Hommel procedure                        | 0/27       | 0%  | 2/25              | 8%  | 23/25      | 92% |
| Dunnett procedure <sup>3</sup>          | 1/26       | 4%  | 13/26             | 50% | 12/26      | 46% |
| Fixed-sequence procedure                | 1/26       | 4%  | 5/26              | 19% | 20/26      | 77% |

|                                                        |      |    |      |     |       |     |
|--------------------------------------------------------|------|----|------|-----|-------|-----|
| Fallback procedure                                     | 1/25 | 4% | 1/25 | 4%  | 23/25 | 92% |
| Serial gatekeeping procedure <sup>2</sup>              | 1/24 | 4% | 5/24 | 21% | 18/24 | 75% |
| Parallel gatekeeping procedure <sup>2</sup>            | 1/23 | 4% | 1/23 | 4%  | 21/23 | 91% |
| Other gatekeeping procedure <sup>2</sup>               | 1/24 | 4% | 3/24 | 13% | 20/24 | 83% |
| Graphical methods (e.g. recycling significance levels) | 0/27 | 0% | 3/24 | 13% | 21/24 | 88% |

---

**Notes:**

*Six other methods were mentioned: Peto-heybittle, group sequential methods, alpha spending, O'Brien & Fleming, Pocock, Posch combination test.*

*Comments given regarding the situation methods were used in (for details see appendix):*

<sup>1</sup> *Used in a range of scenarios, generally multiple primary outcomes and/or treatment comparisons (n=4 comments)*

<sup>2</sup> *Used for multiple outcomes which can be ordered hierarchically (n=1 comment)*

<sup>3</sup> *Used for multiple treatment comparisons (n=3 comments)*

*Peto-heybittle used for interim analysis (n=1 comment)*

*Choice of method depends on the trial design and reason for adjusting (n=2 comments)*
